# Supplementary material for: Main Variables Affecting a Chemical-Enzymatic Method to Obtain Protein and Amino Acids from Resistant Microalgae
Source: Hindawi journal article supplement (doi:10.1155/2019/1390463), 2019-04-28
Supplement: f1 [file 1390463.f1.pdf]

# Main Variables Affecting a Chemical-Enzymatic Method to Obtain Protein and Amino Acids from Resistant Microalgae

Callejo-López J. A., Ramírez M., Bolívar J., and Cantero D.

## SUPPLEMENTARY MATERIAL

Electrophoresis SDS-PAGE analysis was performed using the Bio-Rad Miniprotean® (Bio-Rad Laboratories, USA) according to the procedure of Laemmli [1]. Aliquots of the extracts were prepared in sample buffer, summited at 100 °C for 3 min, and 20 µl were loaded in the lanes of the gel. The run was performed at 110 V and the gel stained for 2 h in Coomassie blue. Gel de-staining was performed overnight with 15:3:2 water: methanol: acetic acid.

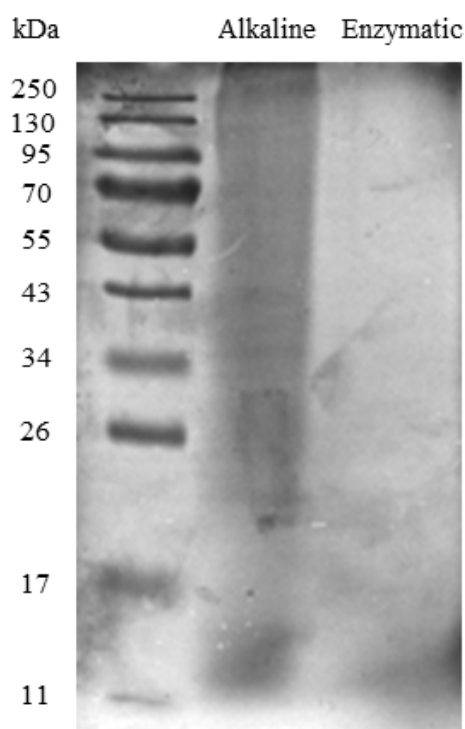

Figure S1. SDS-PAGE of the different extracts obtained by the sequential alkaline – enzymatic process, with separate extractions and non-controlled pH, using fresh biomass at a concentration of 100 mg ml<sup>-1</sup>.

- [1] U.K. Laemmli, “Cleavage of structural proteins during the assembly of the head of bacteriophage T4.” *Nature*. 1970.
